# Supplementary material for: Targeted metabolomic analysis of nitric oxide/L-arginine pathway metabolites in dementia: association with pathology, severity, and structural brain changes
Source: PubMed Central journal article supplement (PMC6760237; doi:10.1038/s41598-019-50205-0), 2019-09-24
Supplement: 41598_2019_50205_MOESM1_ESM.pdf [file 41598_2019_50205_MOESM1_ESM.pdf]

**Title: Targeted metabolomic analysis of nitric oxide/L-arginine pathway metabolites in dementia: association with pathology, severity, and structural brain changes**

**Authors:** Mariusz G. Fleszar, Jerzy Wiśniewski, Marzena Zboch, Dorota Diakowska, Andrzej Gamian, Małgorzata Krzystek-Korpacka

**Supplementary Figure S1** The correlation between DMA and the degree of medial temporal lobe atrophy (MTA) in a subgroup of dementia patients with strategic infarcts

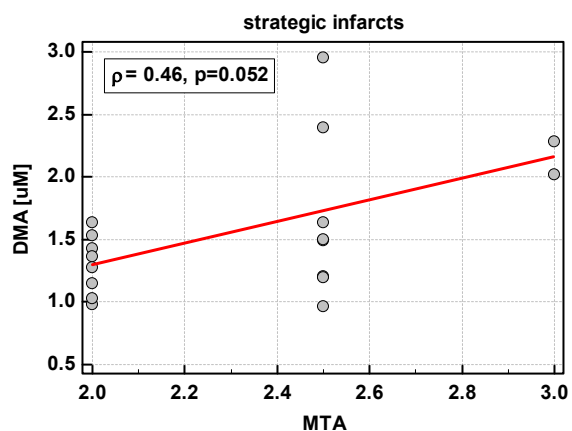

Data analyzed using Spearman rank test and presented as correlation coefficient rho ( $\rho$ ).

**Supplementary Figure S2.** Correlograms showing the interrelationship between metabolites of arginine/No pathway depending on analyzed group

**a. Controls: blood donors**

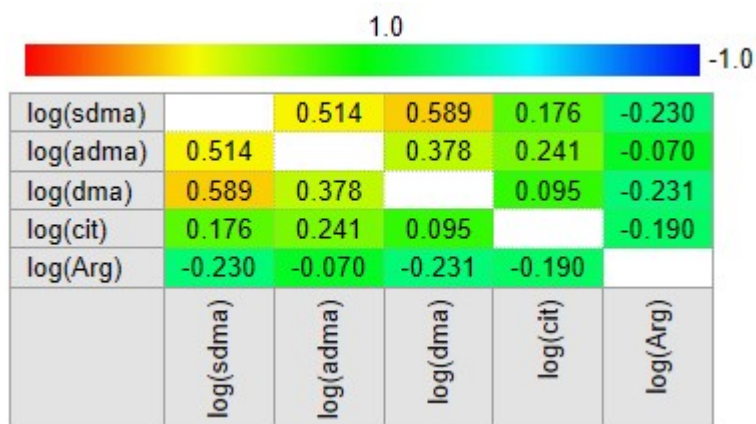

**b. Controls: non-demented patients**

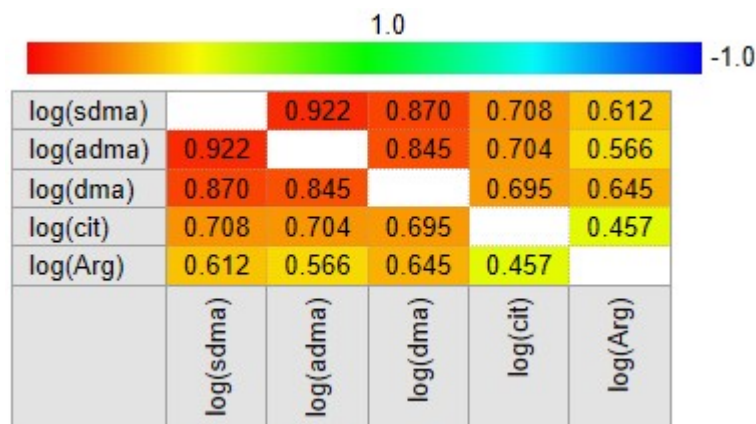

**c. Dementia patients: all**

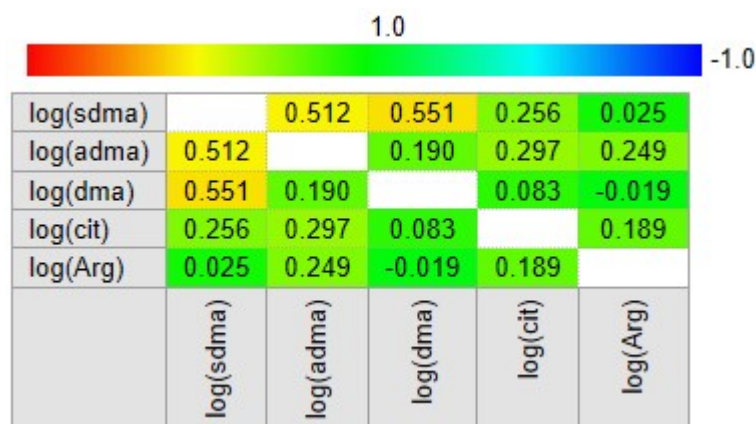

**d. Dementia patients: Alzheimer disease**

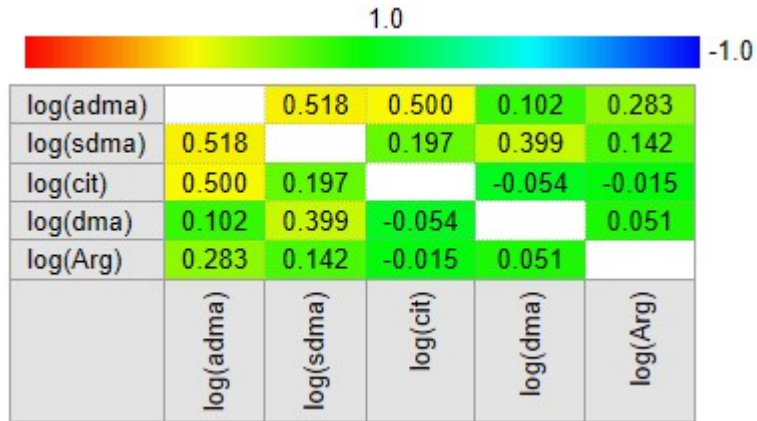

**e. Dementia patients: mixed-type dementia**

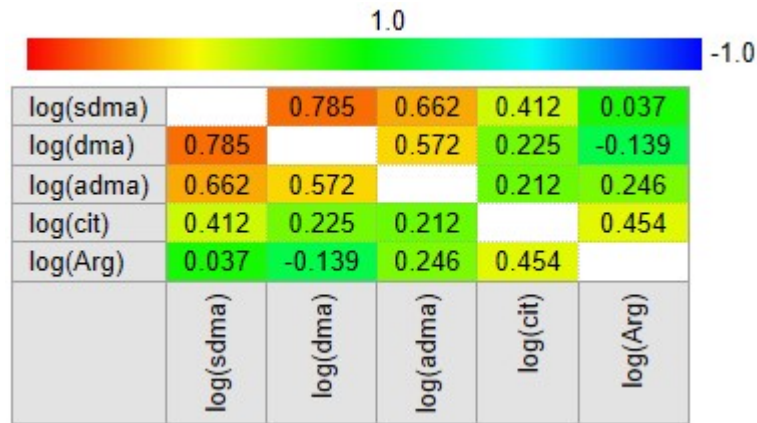

**f. Dementia patients: vascular dementia**

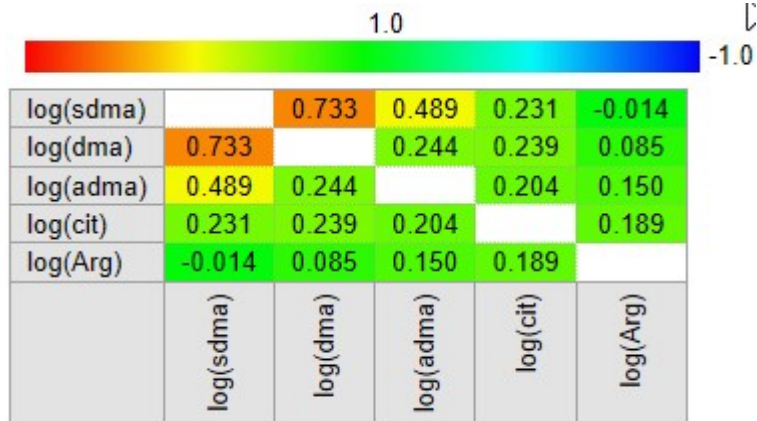

Data presented as Pearson correlation coefficients.

**Supplementary Table S1.** Variables independently associated with intermediates in NO metabolism (multiple regression)

| <b>Dependent variable</b> | <b>Healthy controls</b>                                                                   | <b>Dementia-AD</b>                                                                                                            | <b>Dementia-VaD</b>                                                                      |
|---------------------------|-------------------------------------------------------------------------------------------|-------------------------------------------------------------------------------------------------------------------------------|------------------------------------------------------------------------------------------|
| <b>Arginine (Arg)</b>     | <b>DMA:</b> $r_p=-0.23$ , $p=0.012$<br>$R^2=0.05$                                         | no variables retained                                                                                                         | no variables retained                                                                    |
| <b>ADMA</b>               | <b>SDMA:</b> $r_p=0.53$ , $p<0.0001$<br>$R^2=0.28$                                        | <b>Arg:</b> $r_p=0.31$ , $p=0.039$<br><b>SDMA:</b> $r_p=0.48$ , $p<0.001$<br><b>Cit:</b> $r_p=0.50$ , $p<0.001$<br>$R^2=0.49$ | <b>SDMA:</b> $r_p=0.49$ , $p=0.001$<br>$R^2=0.24$                                        |
| <b>SDMA</b>               | <b>ADMA:</b> $r_p=0.41$ , $p<0.0001$<br><b>DMA:</b> $r_p=0.49$ , $p<0.0001$<br>$R^2=0.45$ | <b>ADMA:</b> $r_p=0.52$ , $p<0.001$<br><b>DMA:</b> $r_p=0.41$ , $p=0.005$<br>$R^2=0.39$                                       | <b>ADMA:</b> $r_p=0.47$ , $p=0.003$<br><b>DMA:</b> $r_p=0.73$ , $p<0.0001$<br>$R^2=0.64$ |
| <b>Citrulline (Cit)</b>   | <b>ADMA:</b> $r_p=0.25$ , $p=0.006$<br>$R^2=0.06$                                         | <b>ADMA:</b> $r_p=0.50$ , $p<0.001$<br>$R^2=0.25$                                                                             | no variables retained                                                                    |
| <b>DMA</b>                | <b>SDMA:</b> $r_p=0.59$ , $p<0.0001$<br>$R^2=0.34$                                        | <b>SDMA:</b> $r_p=0.40$ , $p=0.005$<br>$R^2=0.15$                                                                             | <b>SDMA:</b> $r_p=0.73$ , $p<0.0001$<br>$R^2=0.54$                                       |

Results of multiple regression (stepwise method) presented as variables retained in the model (in bold) together with partial correlation coefficient ( $r_p$ ; net correlation, without the interference of others) and statistical significance as well as goodness of fit of the model represented by the coefficient of determination  $R^2$ .
